# Supplementary material for: USP13 promotes deubiquitination of ZHX2 and tumorigenesis in kidney cancer
Source: PubMed Central journal article supplement — Proc Natl Acad Sci U S A. 2022 Aug 29;119(36):e2119854119. doi: 10.1073/pnas.2119854119 (PMC9457248; doi:10.1073/pnas.2119854119), 2022-08-29
Supplement: pnas.2119854119.sapp.pdf [file pnas.2119854119.sapp.pdf]

# SI APPENDIX

## Figure S1

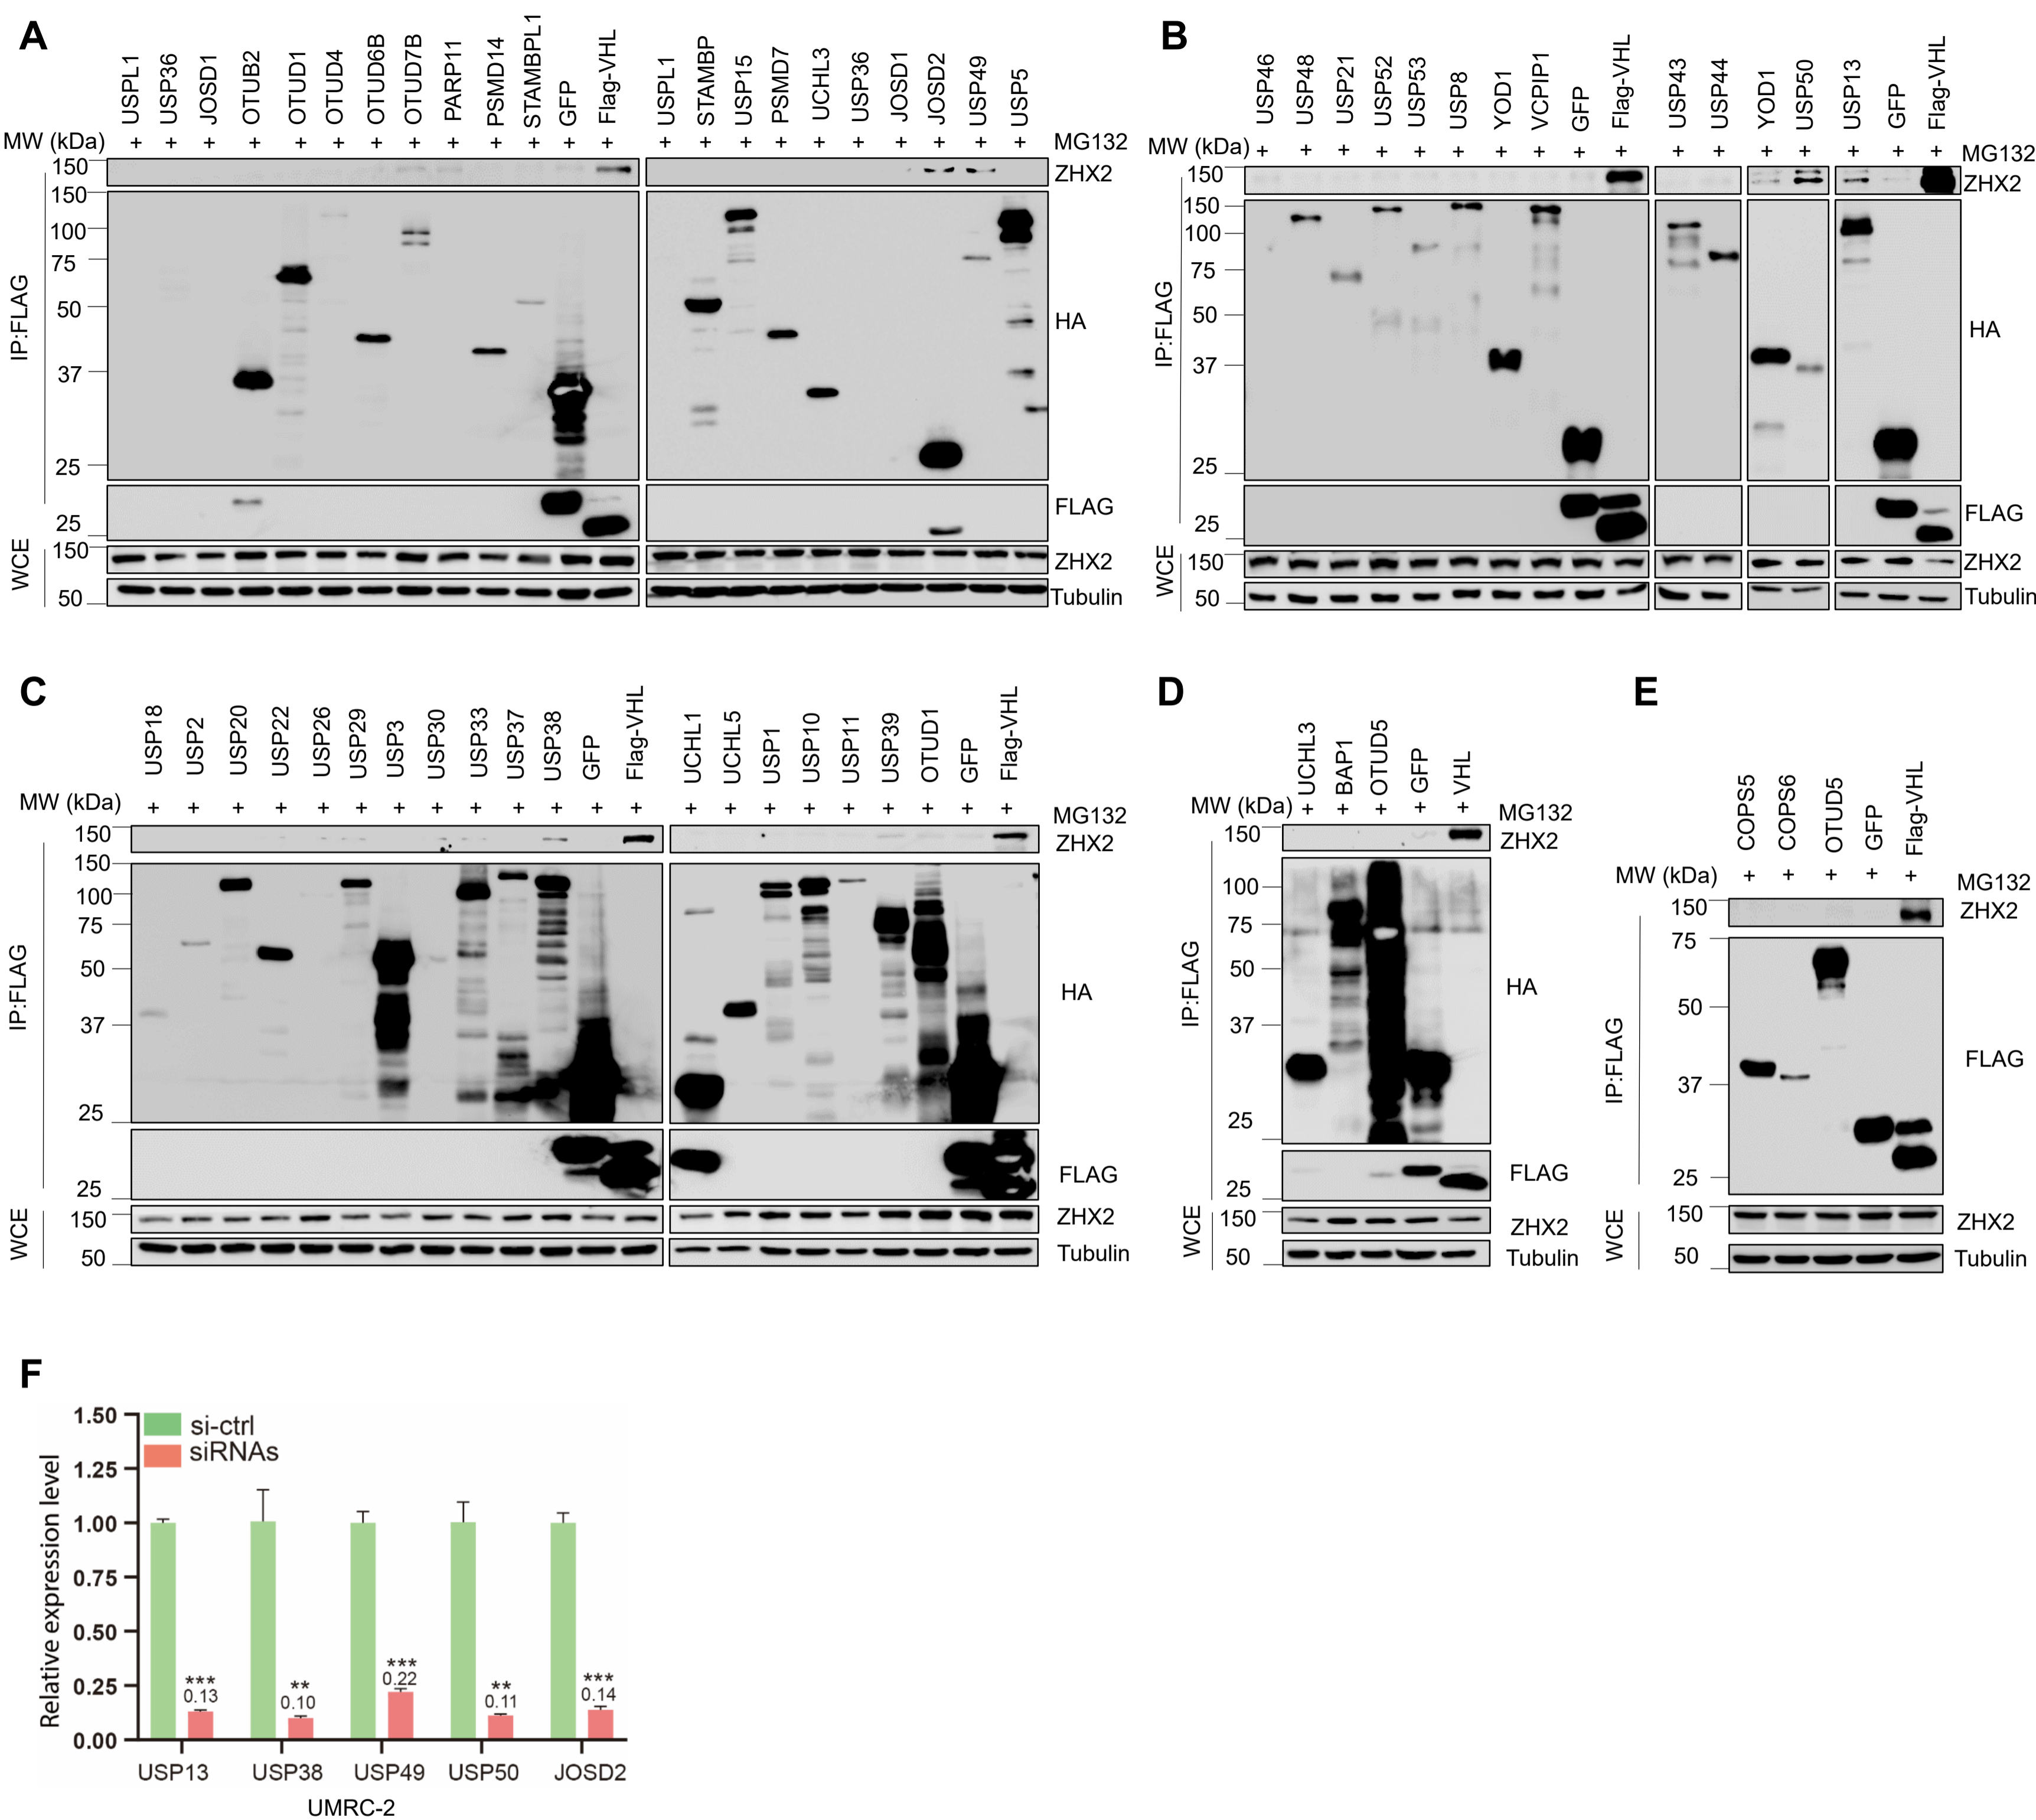

**Figure S1. Screen to identify DUBs that bind with ZHX2.**

**A-E** Immunoblots of whole cell extracts (WCE) and immunoprecipitations (IP) from 293T cells transfected with Flag-HA tagged DUB proteins and treated with 10 $\mu$ M MG132 as indicated. FLAG-HA-GFP is negative control, FLAG-VHL is positive control. For the blot “IP: Flag, IB: Flag”, only partial gel showing focusing on GFP and VHL expression(A-D). Fig S1E only had IP:FLAG,IB:FLAG. **F**. qRT-PCR quantification of indicated genes from UMRC-2 cells transfected with corresponding siRNA pools. Error bars, SEM; \*, P < 0.05; \*\*, P < 0.01; \*\*\*, P < 0.001.

## Figure S2

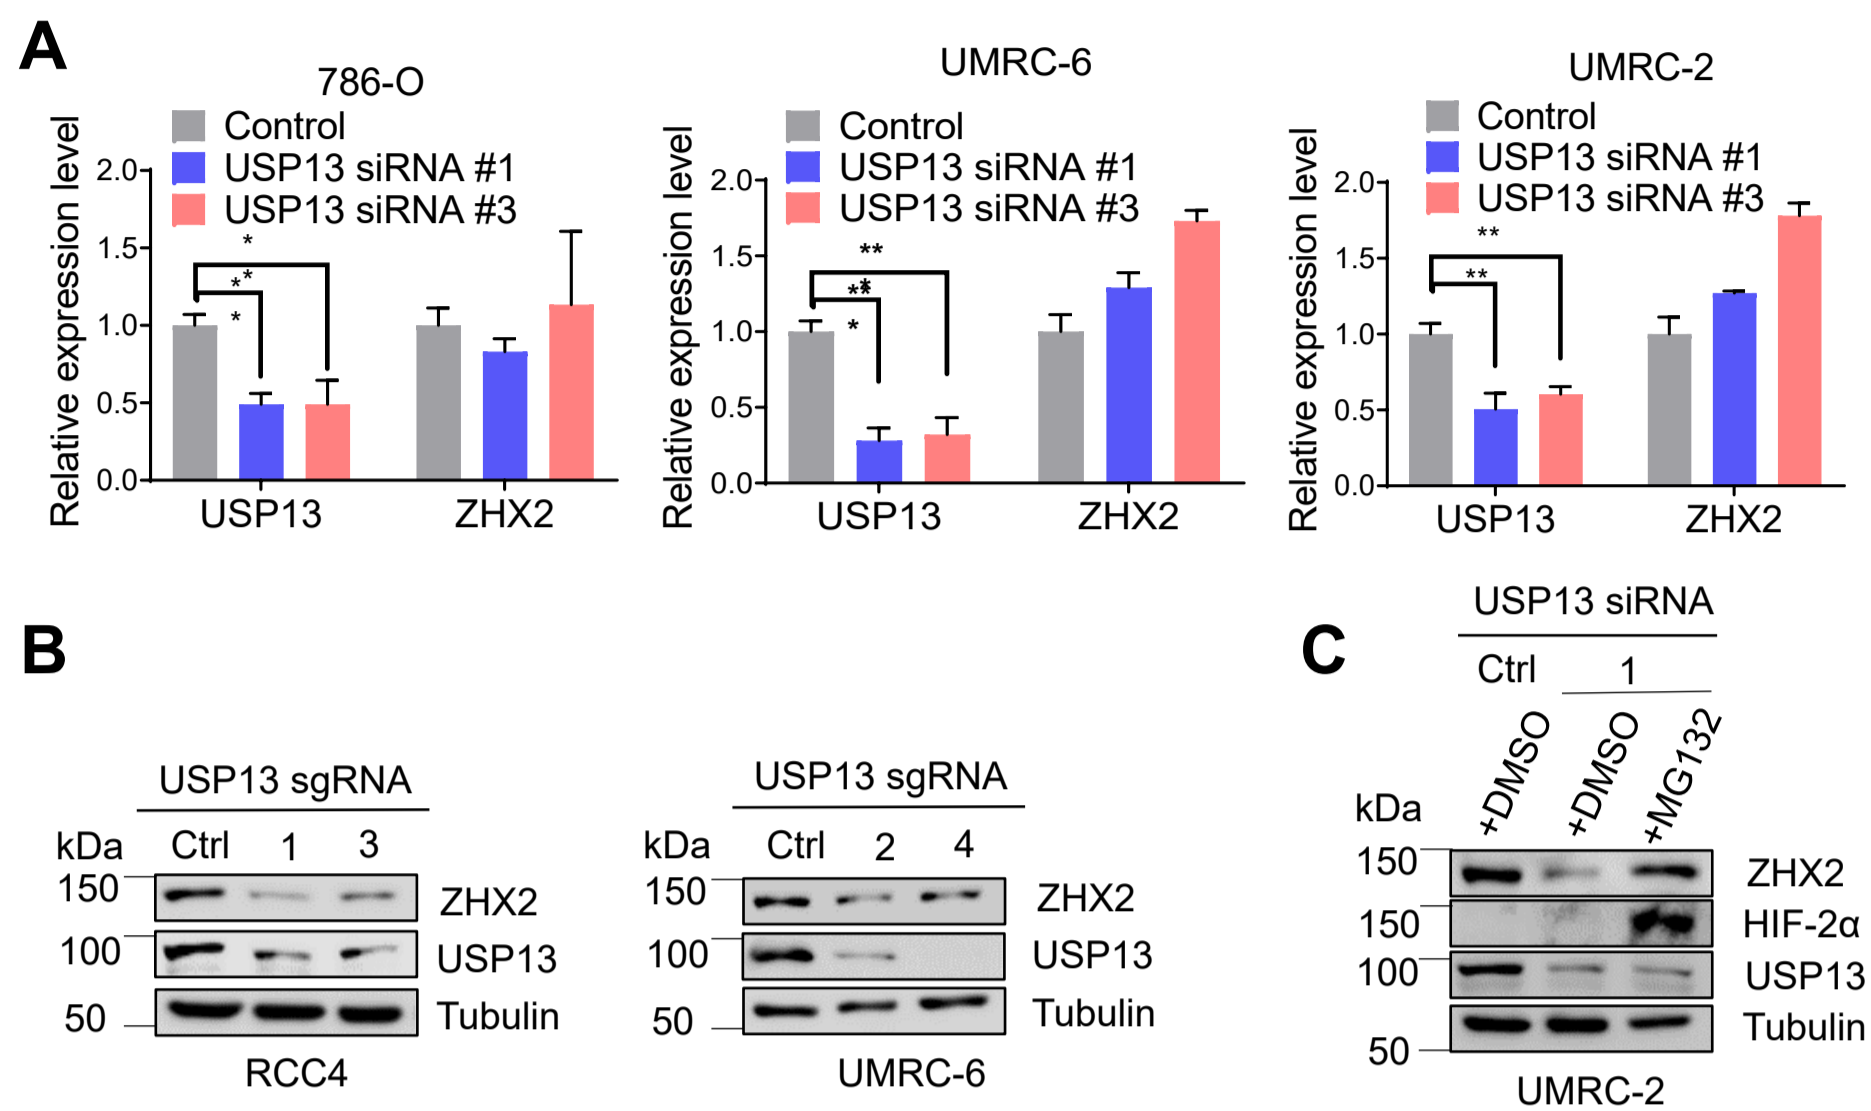

### Figure S2. USP13 depletion leads to decreased ZHX2 by promoting ZHX2 degradation.

**A.** USP13-KD does not affect the transcription of ZHX2. The mRNA level of ZHX2 and USP13 in ccRCC cell lines (786-O, UMRC-6 and UMRC-2) transfected with siUSP13 (#1 and #3). **B.** USP13-KD affect the protein level of ZHX2. The protein level of ZHX2 and USP13 in ccRCC cell lines (786-O, UMRC-6 and UMRC-2) infected with sgUSP13. **C.** USP13 depletion leads to decreased ZHX2 by promoting ZHX2 degradation. Immunoblots of lysates from UMRC-2 infected with USP13 siRNA, and then treated with DMSO or MG132 as indicated. Error bars, SEM; \*,  $P < 0.05$ ; \*\*,  $P < 0.01$ ; \*\*\*,  $P < 0.001$ .

## Figure S3

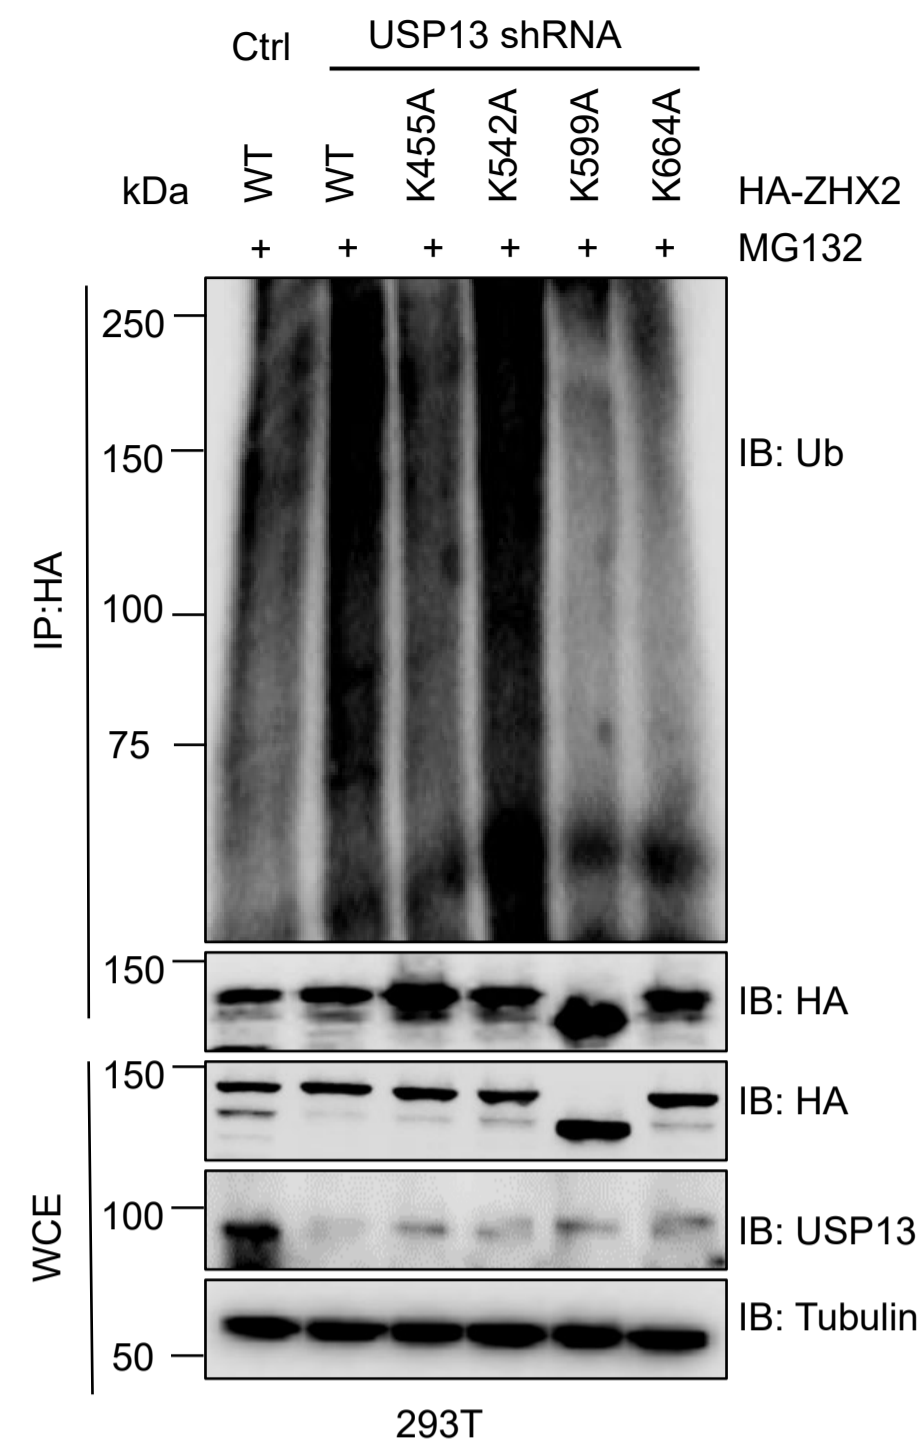

### Figure S3. Potential ubiquitination site(s) of ZHX2 regulated by USP13.

Immunoblots of WCE or IP from 293T cell transfected with USP13 shRNA, Ctrl or HA-ZHX2-WT, HA-ZHX2 mutant (K455A, K542A, K599A or K664A) and then treated with 10  $\mu$ M MG132 as indicated.



**Figure S4**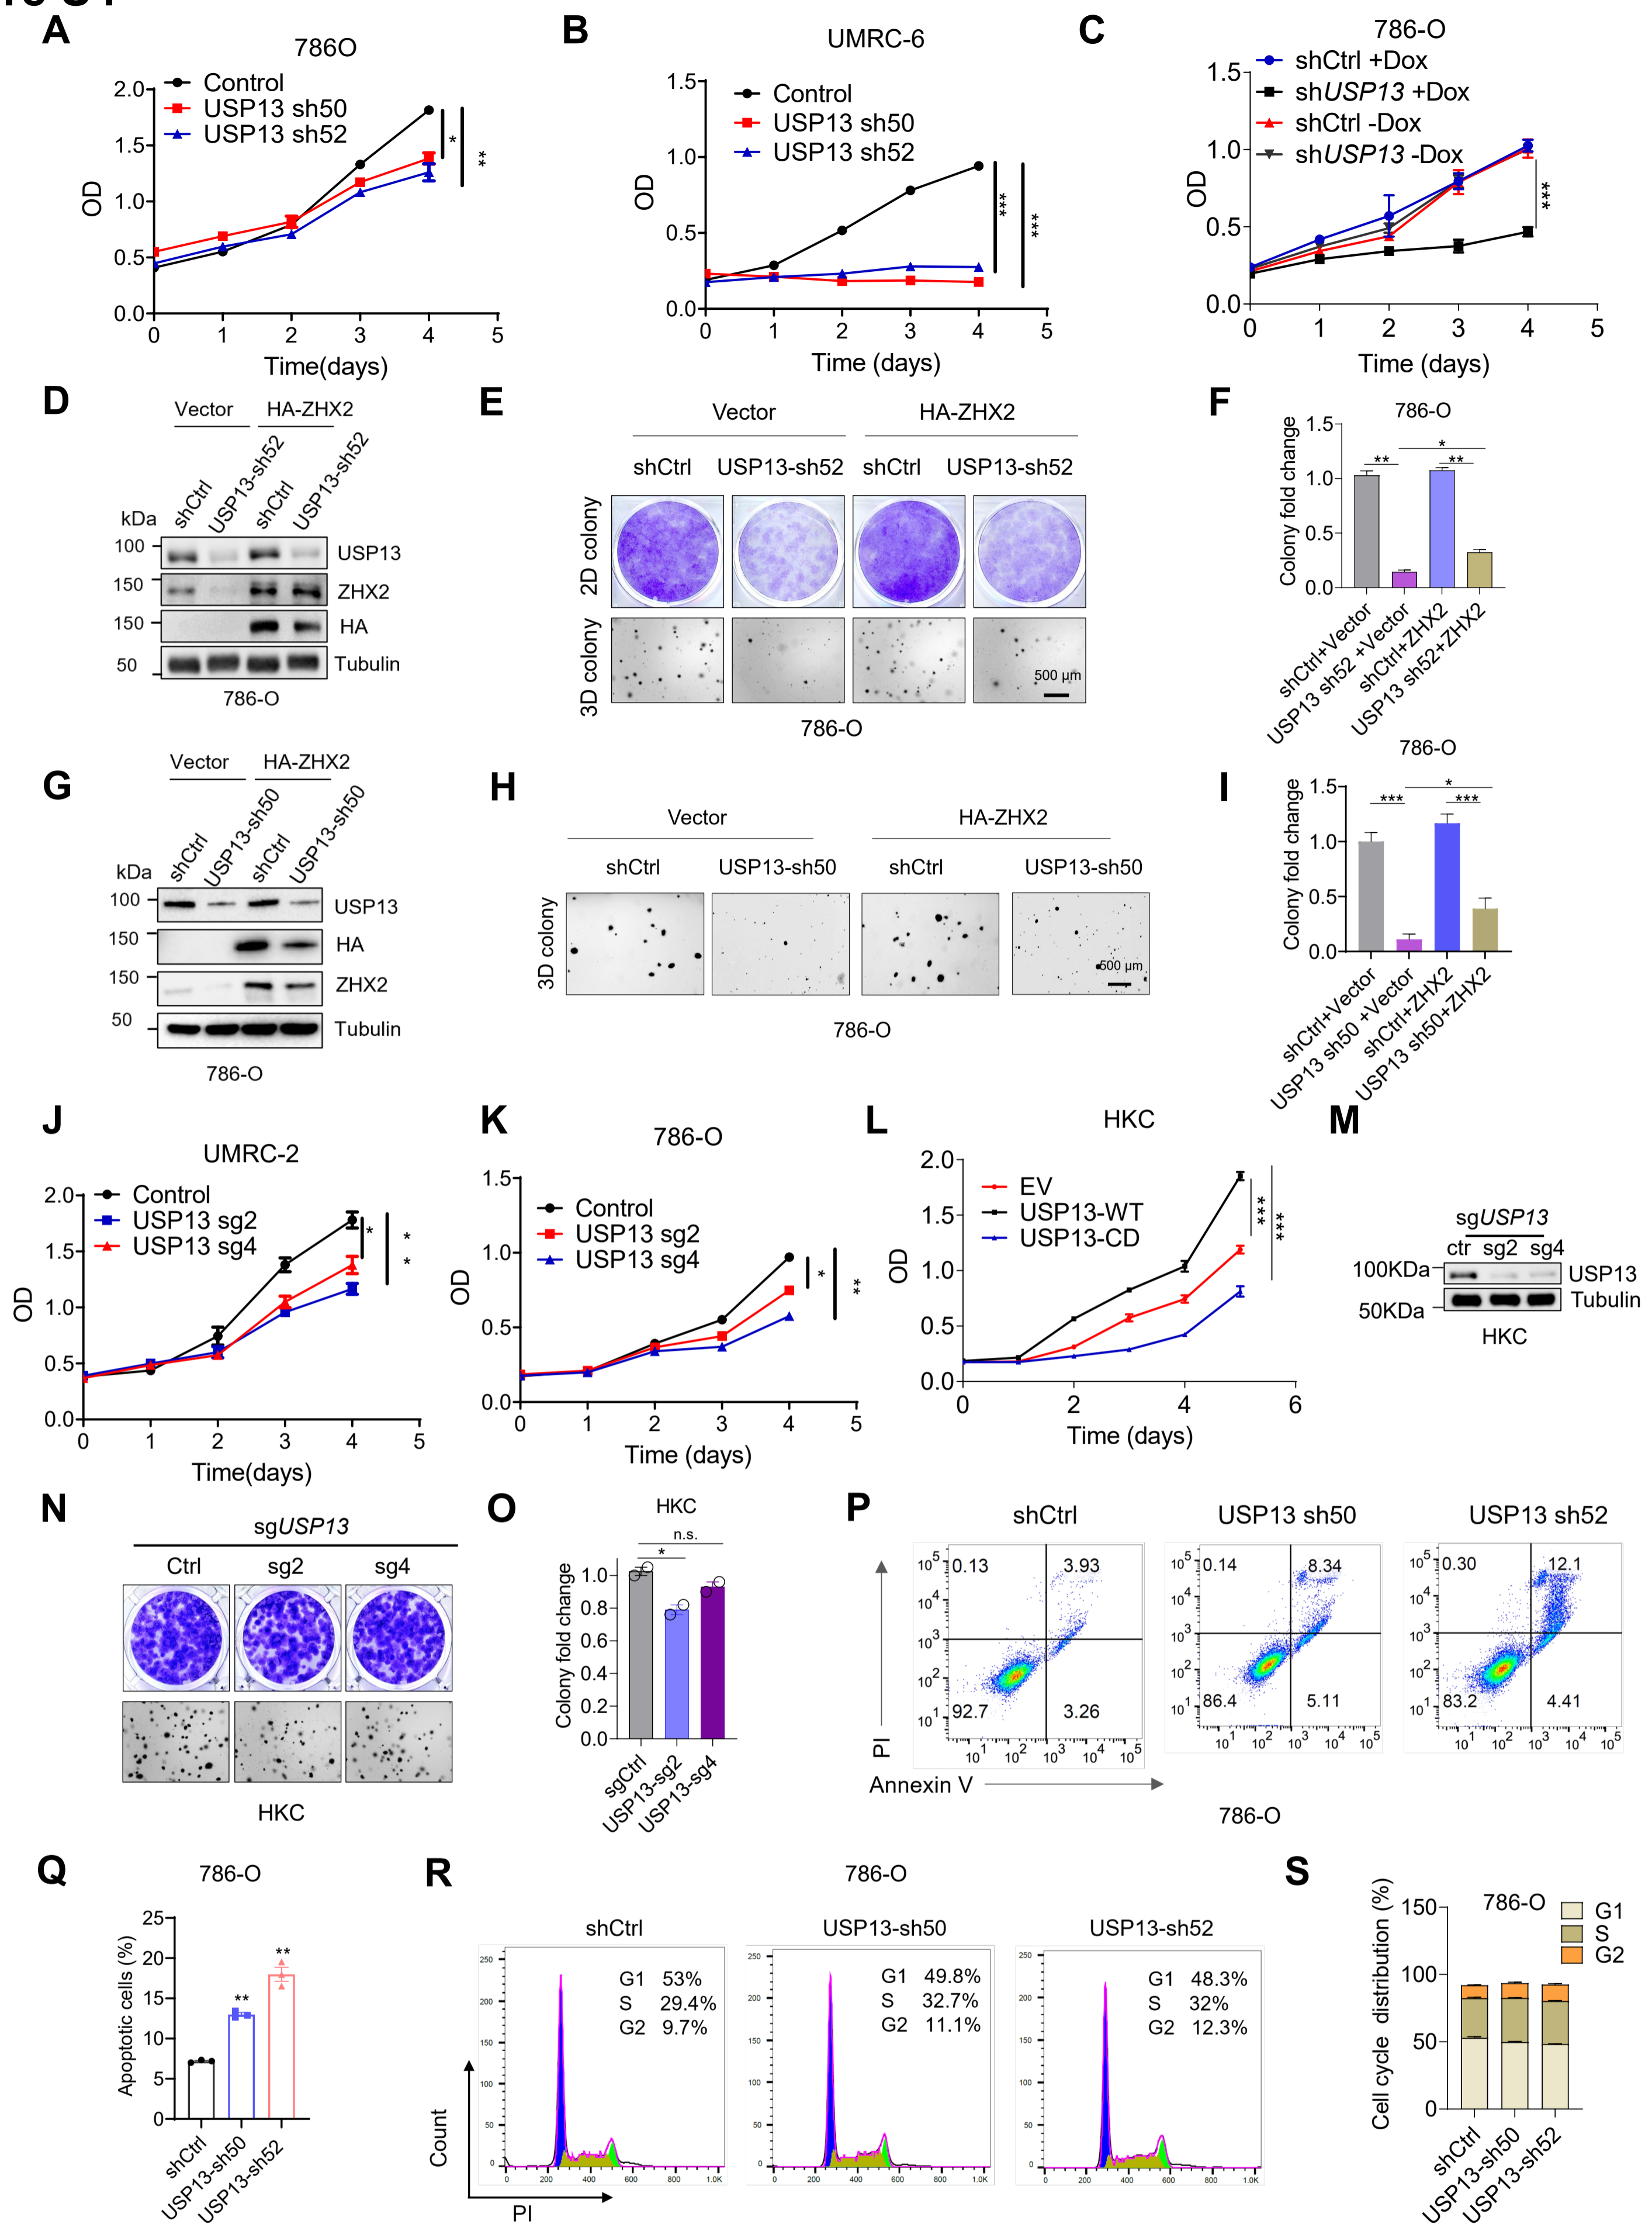**Figure S4. Loss of USP13 suppresses ccRCC cell growth.**

**A-B.** Proliferation of indicated cells infected with lentivirus containing either Ctrl shRNA or shRNA targeting USP13. **C.** Proliferation of 786-O infected with either inducible Ctrl shRNA or inducible shRNA targeting USP13 (sh50) and then treated with doxycycline as indicated. **D-I.** Immunoblots of lysates (D or G), crystal violet staining (E), representative 3D soft agar growth pictures (E or H) and quantification of colony numbers (triplicate wells) (F or I) of 786-O cells infected with lentivirus encoding Ctrl, USP13 sh52(D-F) or sh50(G-I) or pLenti6-vec, pLenti6-HA-ZHX2 as indicated. **J-K.** Proliferation of indicated cells infected with lentivirus containing either Ctrl sgRNA or sgRNA targeting USP13. **L.** Proliferation of HKC infected with lentivirus containing empty vector, USP13-WT or USP13- CD. **M-O.** Immunoblots of lysates (M), crystal violet staining (N), representative 3D soft agar growth pictures (N) and quantification of colony numbers (triplicate wells) (O) of HKC cells infected with lentivirus encoding Ctrl, USP13 sg2 or sg4 as indicated. **P-Q.** Apoptotic rates (P) and quantification of apoptosis cells (Q) of 786-O cells infected with lentivirus encoding Ctrl, USP13 sh50 or sh52 as indicated. **R-S.** The proportion of cell cycle (R) and quantification of each cell cycle (S) of 786-O cells infected with lentivirus encoding Ctrl, USP13 sh50 or sh52 as indicated. Error bars, SEM; \*,  $P < 0.05$ ; \*\*,  $P < 0.01$ ; \*\*\*,  $P < 0.001$ .



**Figure S5**

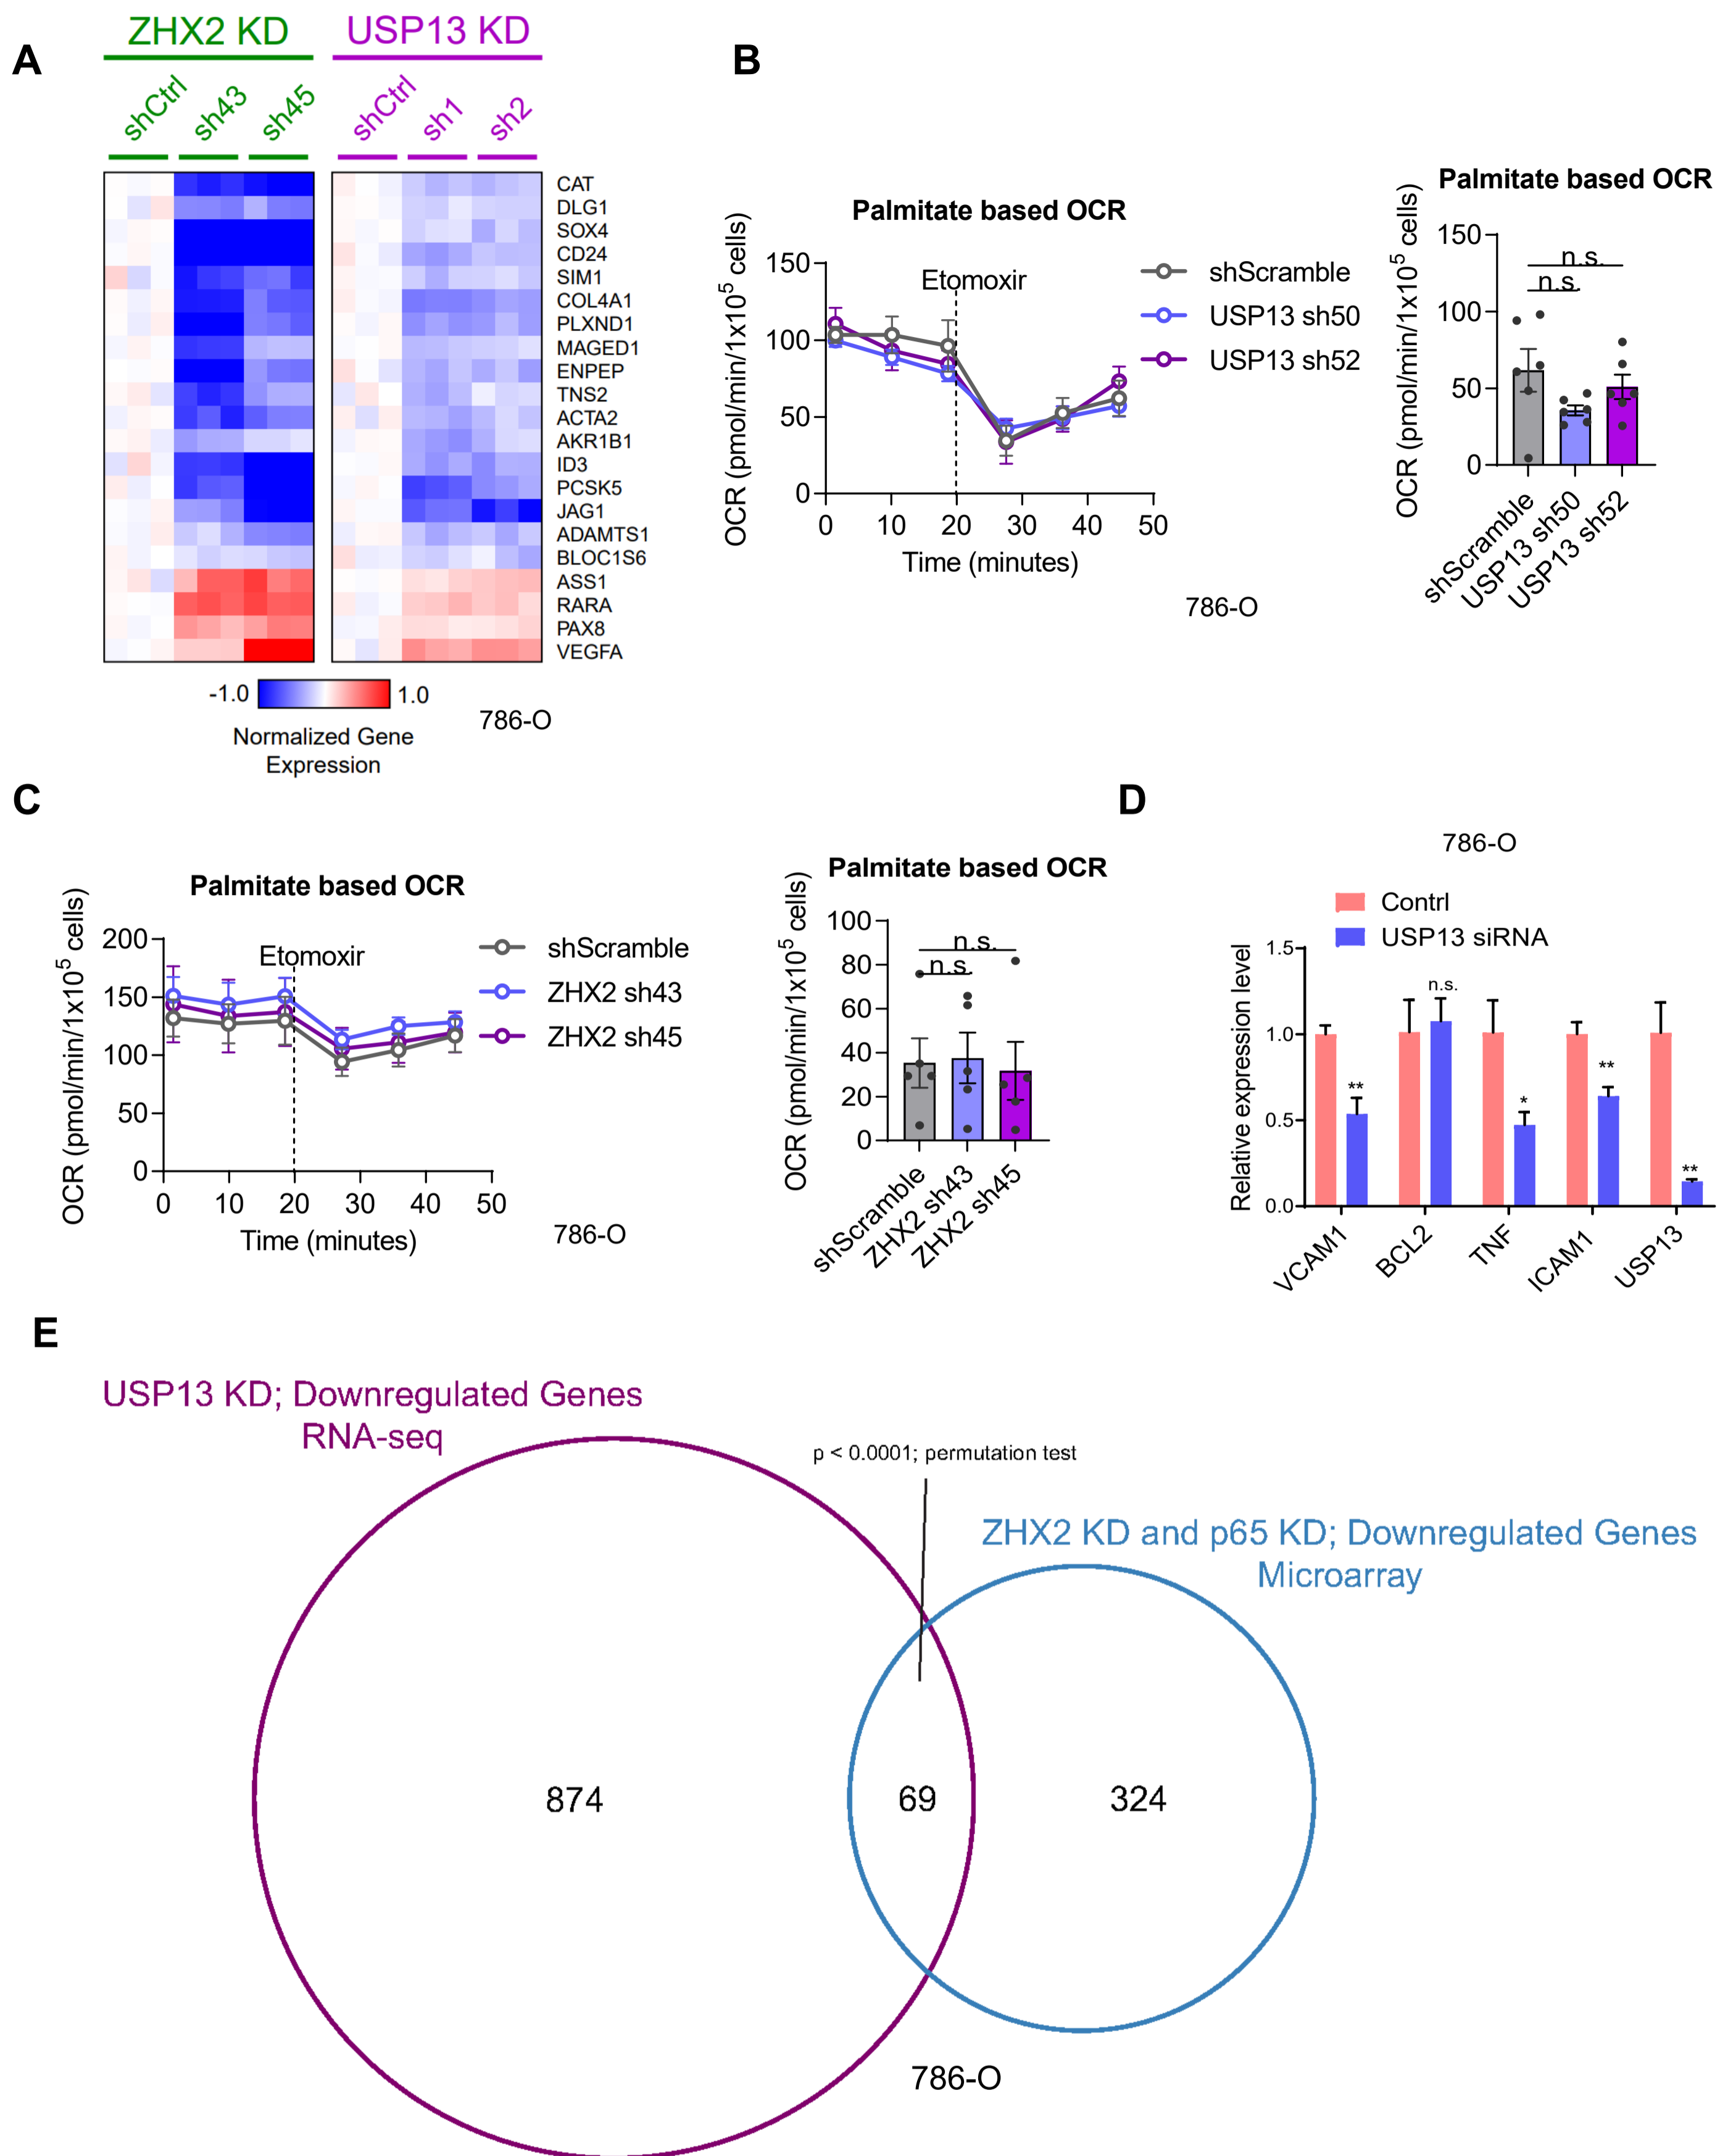

**Figure S5. USP13 regulates gene expression involved in ZHX2 signaling in ccRCC.**

**A.** Heatmap with USP13 shRNA and ZHX2 shRNA data for those 21 commonly regulated genes in the kidney, renal and urogenital system development. **B.** Palmitate-based oxygen consumption rate (OCR) indicating the fatty acid utilization in USP13 depleted 786-O cells. Etomoxir was added at indicated time to block the fatty acid oxidation (FAO) in mitochondria. And the quantified FAO rates were calculated between the OCR value before or after Etomoxir treatment. **C.** OCR indicating the fatty acid utilization in ZHX2 depleted 786-O cells. And the quantified FAO rates were calculated between the OCR value before or after Etomoxir treatment. **D.** qRT-PCR quantification of indicated genes from 786-O cells transfected with Control or USP13 siRNAs. **E.** Venn-Diagram of overlap between the 390 coordinately downregulated ZHX2 and p65 genes<sup>1</sup> and the 943 downregulated USP13 KD Genes. Error bars, SEM; \*, P < 0.05; \*\*, P < 0.01; \*\*\*, P < 0.001. "n.s." represent not significant.

## Figure S6

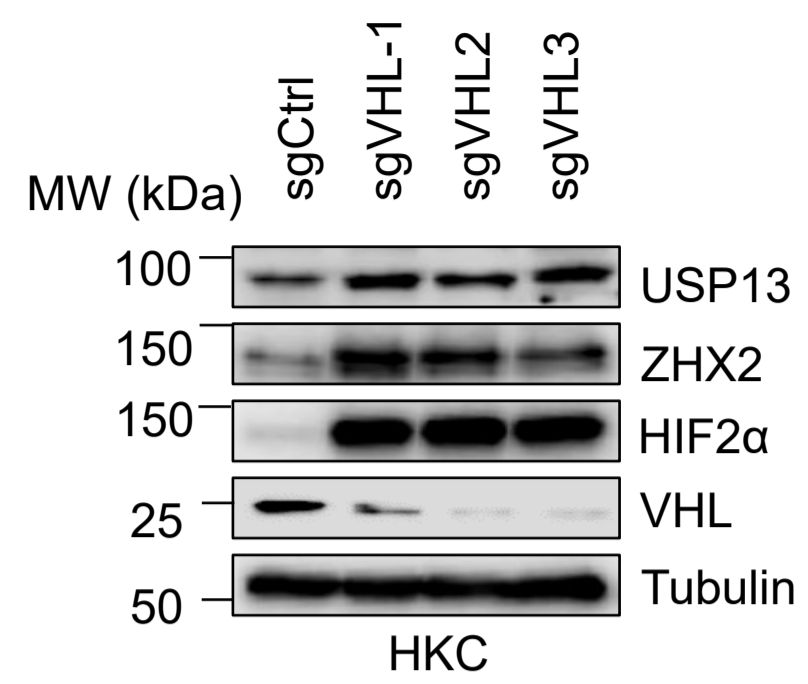

### Figure S6. Validation of the potential correlation between USP13 and pVHL status in HKC cells

Immunoblots of the lysates from HKC cells transfected with sgVHL-1, sgVHL-2, sgVHL-3 or sgCtrl as indicated.

Figure S7

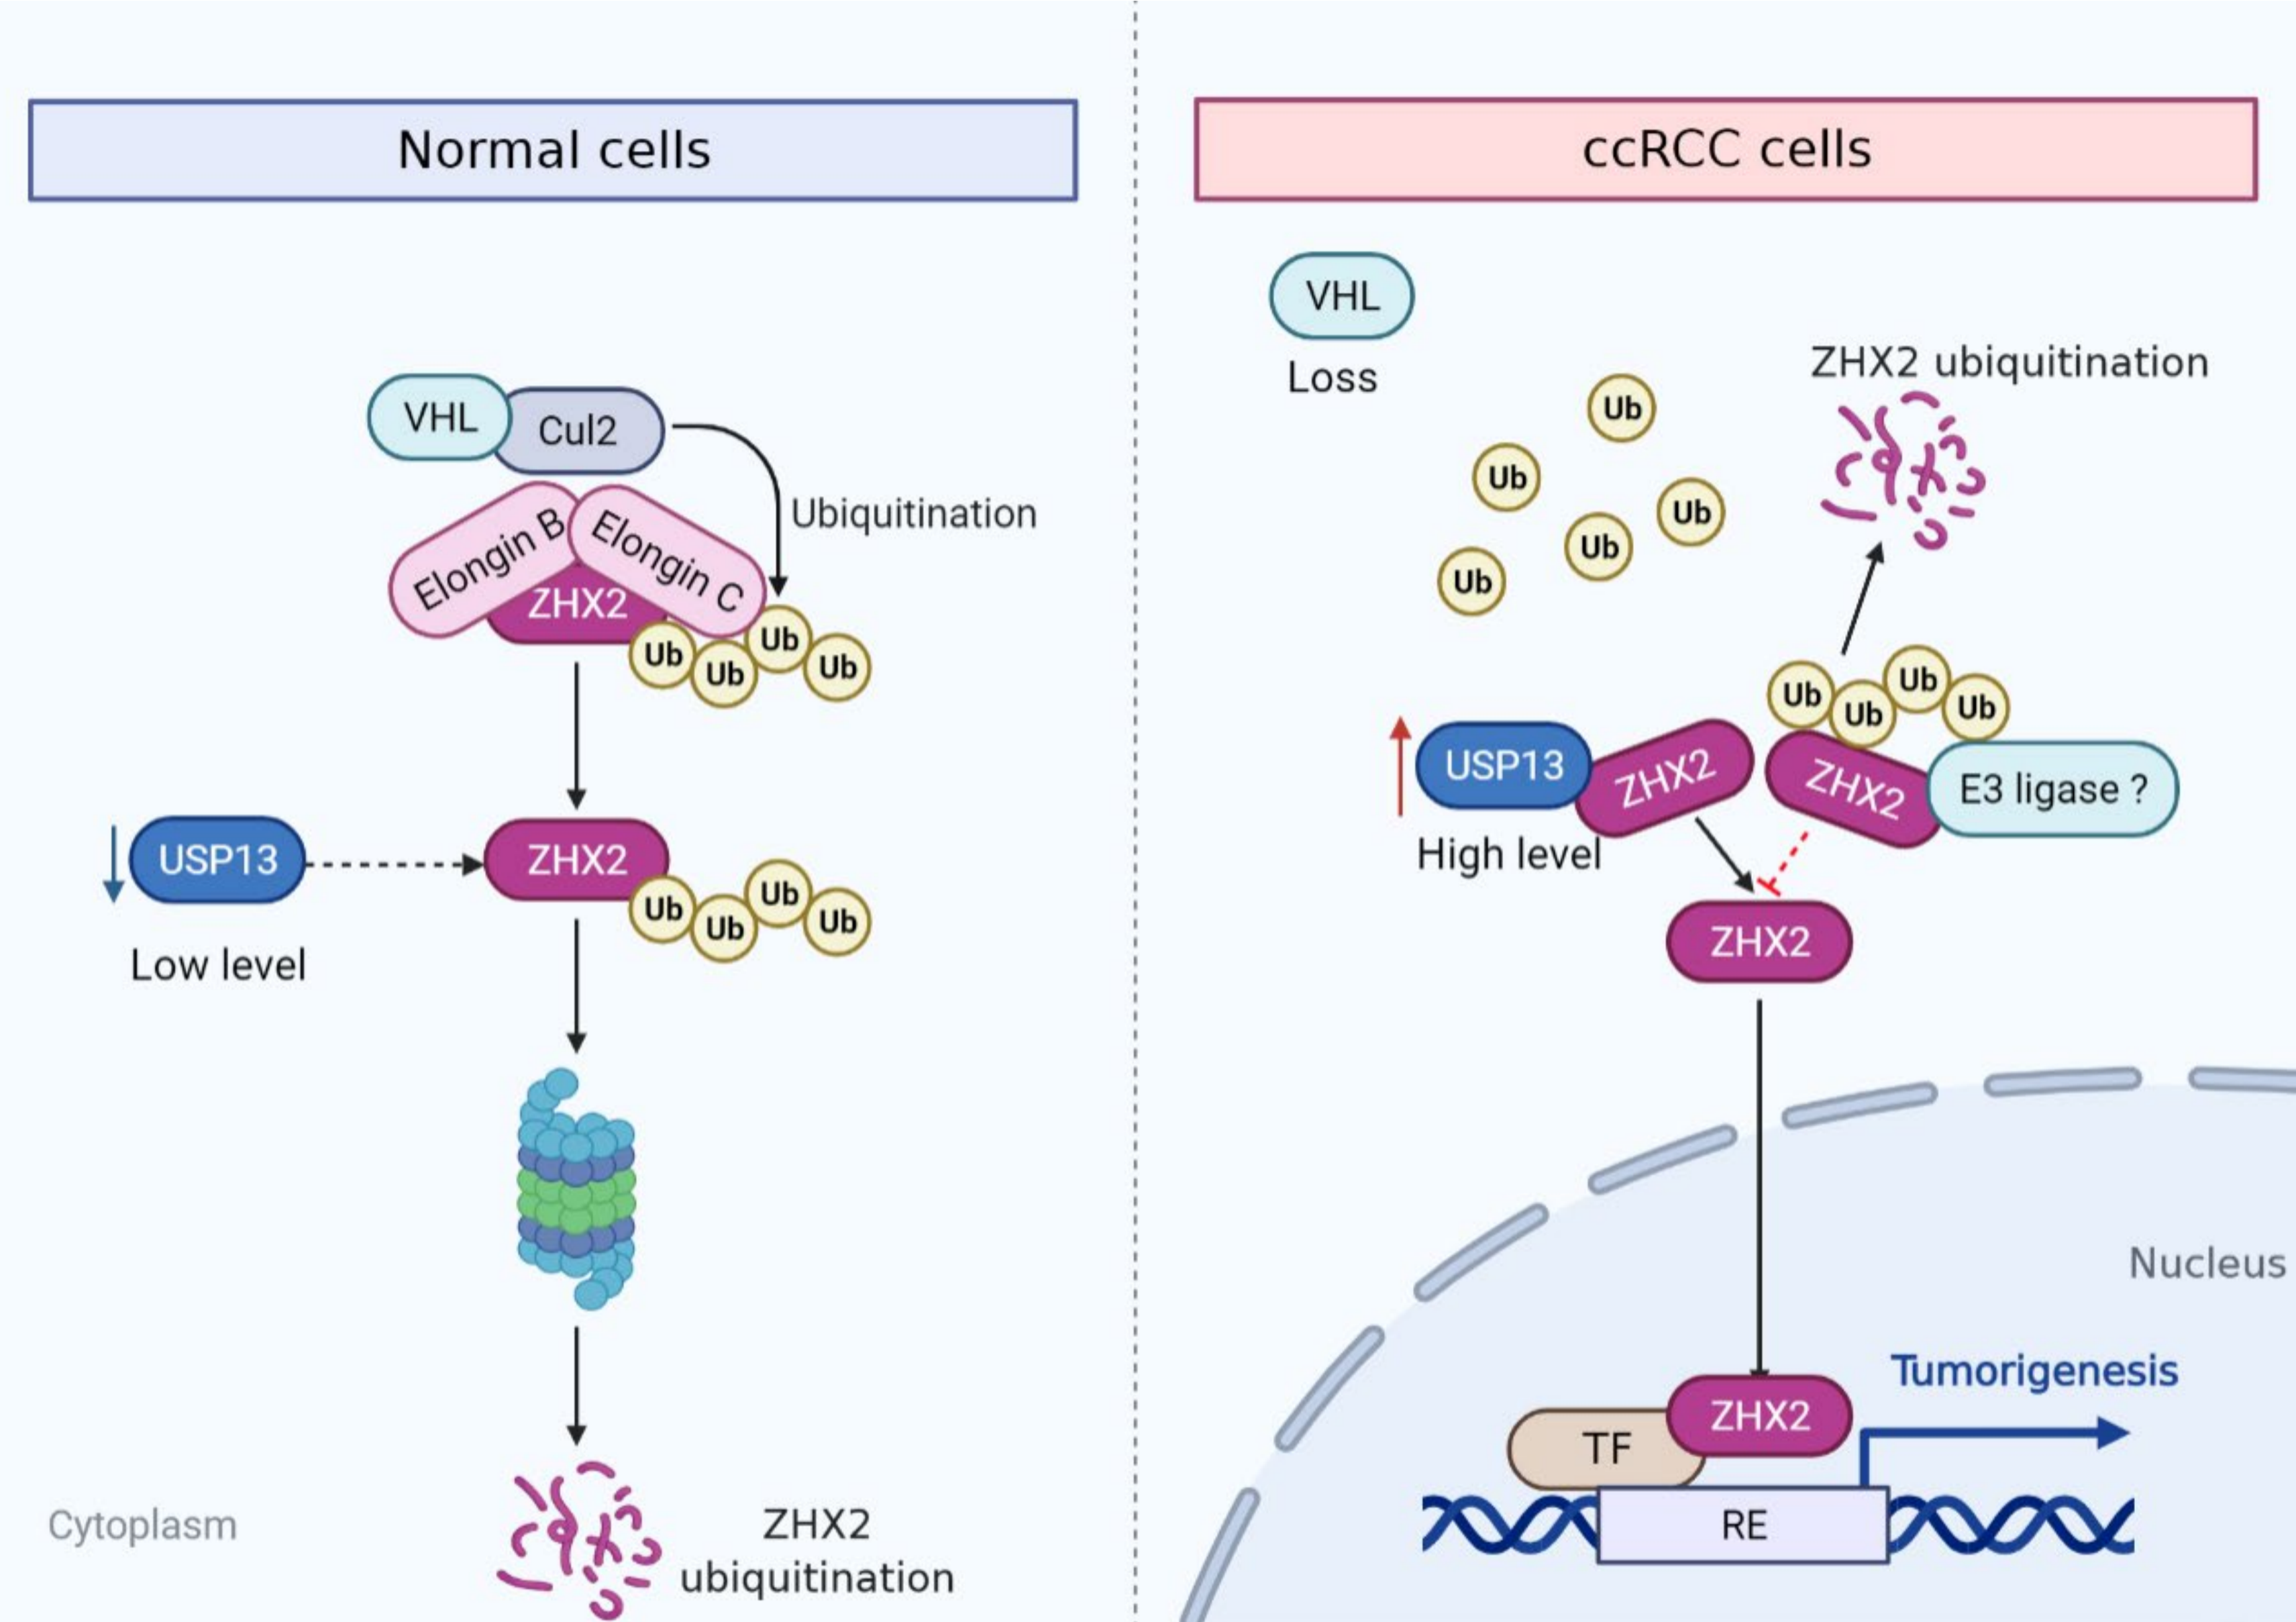

Figure S7. Proposed model depicts the molecular mechanism that USP13 regulates ZHX2 ubiquitination and ccRCC progression.

Ub, ubiquitin. TF, transcriptional factor, RE, response elements.



**Table S1. USP13 and ZHX2 commonly regulated gene in 786-O cells.**

| <b>Common upregulated DEGs</b> | <b>Common downregulate DEGs</b> | <b>Common upregulated DEGs</b> | <b>Common downregulate DEGs</b> | <b>Common upregulated DEGs</b> | <b>Common downregulate DEGs</b> |
|--------------------------------|---------------------------------|--------------------------------|---------------------------------|--------------------------------|---------------------------------|
| ANGPTL4                        | ESPN                            | MAFK                           | MAP2K6                          | CASKIN2                        | GLUD1                           |
| FOSL1                          | SFRP4                           | USP40                          | SKAP2                           | DMPK                           | NFYA                            |
| PINLYP                         | UGT2A3                          | FANCA                          | KLHL4                           | TCERG1                         | LAPTM4B                         |
| WDR62                          | BTG2                            | WASH3P                         | SYT11                           | SNHG3                          | DLG1                            |
| TFPI2                          | ZHX2                            | RTEL1-TNFRSF6B                 | LMCD1                           | RPL5                           | CDKN1A                          |
| MAFF                           | VAV3                            | DAZAP1                         | ENPEP                           | NASP                           | DYNC2LI1                        |
| SLC2A3                         | TMC4                            | CCT6A                          | ERV3-1                          | UBE2G2                         | ERBIN                           |
| MYEOV                          | LGALS9                          | DDX55                          | ACTA2                           | MORF4L2                        | MAGED1                          |
| MAPK13                         | ALDH1A1                         | LOC729218                      | GBE1                            | TRAP1                          | MLEC                            |
| PPP1R15A                       | WDR72                           | DDX11                          | TLR3                            | PTPN23                         | TMCO3                           |
| ITPKA                          | GMNC                            | RPL36A                         | TMEM141                         | MYO9B                          | LDLR                            |
| RIN1                           | FLRT3                           | MRPL41                         | SLC7A7                          | COL6A2                         | SGCB                            |
| KLF2                           | C1orf116                        | SH3BP5-AS1                     | TOM1L1                          | SPG7                           | KDELC1                          |
| TRIB2                          | AMACR                           | WASH7P                         | DAB2                            | ANXA5                          | RTN4                            |
| NOV                            | CLEC18A                         | HAGHL                          | SLC24A1                         |                                | FDFT1                           |
| LOC100287497                   | HOGA1                           | MRPS6                          | SH3D19                          |                                | EPB41                           |
| NCEH1                          | C1QL3                           | IDH3A                          | WBP1L                           |                                | STARD4                          |
| DOK3                           | FILIP1L                         | RPL38                          | TIMD4                           |                                | FAM107B                         |
| C5orf66                        | MMP7                            | CAD                            | AIG1                            |                                | SAMD9L                          |
| ZNF90                          | SCD                             | GDI1                           | SLC41A2                         |                                | NAPEPLD                         |
| SH2D5                          | SULT1A1                         | POU5F1                         | SLC44A1                         |                                | ARL6IP5                         |
| P2RY11                         | SOX4                            | SAFB                           | COL4A1                          |                                | PIK3CB                          |
| MROH6                          | SLC12A3                         | RPL35                          | HOXA5                           |                                | MEX3D                           |
| SLC16A3                        | DDC                             | KATNAL1                        | UBE2H                           |                                | NDFIP2                          |
| TTN                            | FGFR3                           | MPP3                           | DCAF6                           |                                | H3F3AP4                         |
| LOC728392                      | ELF3                            | PSMG4                          | ALDH4A1                         |                                | AIM1                            |
| CRIPAK                         | C1QTNF3-AMACR                   | MSANTD2                        | TM7SF3                          |                                | SKP2                            |
| HERC2P9                        | ACE2                            | SNU13                          | TNFAIP6                         |                                | CD164                           |
| SMG1P7                         | CD24                            | SNX15                          | JAG1                            |                                | NUMB                            |
| ASS1                           | MAP7D2                          | ALG3                           | ADGRL2                          |                                | ATPAF1                          |
| AMIGO2                         | PTER                            | ZNF621                         | RPRD2                           |                                | SECISBP2L                       |
| RNR2                           | LRG1                            | NXPH4                          | MIA2                            |                                | FUT8                            |
| CHTF18                         | PRRG4                           | ADM                            | CCDC85C                         |                                | DHCR7                           |
| SRM                            | PLXDC2                          | SLC25A16                       | S100A2                          |                                | TPST1                           |
| EMC3-AS1                       | HS6ST1                          | RPS28                          | FARP1                           |                                | IFT46                           |
| TMEM265                        | FSTL1                           | HNRNPH3                        | PNPLA3                          |                                | WASHC4                          |
| ZNF276                         | ANXA4                           | AKT1S1                         | LSS                             |                                | KIAA1191                        |
| CLDN15                         | HGD                             | ANAPC7                         | NEFL                            |                                | DSG2                            |
| FAM50A                         | LOC102724593                    | PELP1                          | LOC339803                       |                                | SKP1                            |
| VEGFA                          | SIM1                            | POLE                           | KCTD20                          |                                | RIN2                            |
| DYNLL2                         | LYNX1                           | RABGGTB                        | TMEM169                         |                                | SLC1A1                          |
| ZNF432                         | SLC6A12                         | FAAP20                         | DGCR5                           |                                | VIM-AS1                         |
| BAIAP2L2                       | S100A4                          | CHAF1A                         | PGAP3                           |                                | SLFN5                           |
| CYSTM1                         | ARSD                            | BTG3                           | RTN2                            |                                | ADAMTS1                         |
| GOLGA6L9                       | CDH6                            | NEURL4                         | CPEB2                           |                                | KIAA1522                        |
| NOP2                           | COL8A1                          | SS18                           | CTNND1                          |                                | GLB1                            |
| TRMT1                          | B4GALT5                         | CALCOCO2                       | PDLIM5                          |                                | GALNS                           |
| RARA                           | AQP3                            | LCAT                           | LFNG                            |                                | F11R                            |
| PSMC3IP                        | ZFHX4                           | SLC23A2                        | ARMC9                           |                                | SNX5                            |
| H2AFX                          | LIPC                            | PAX8                           | HOXA9                           |                                | LRRFIP1                         |
| GPRC5C                         | TRIM5                           | POGLUT1                        | ECHDC1                          |                                | MARCKS                          |
| RPL22L1                        | TM4SF18                         | HMGXB3                         | VGLL4                           |                                | CMBL                            |
| AGAP6                          | PCSK5                           | RRM2                           | TTYH3                           |                                | PPIC                            |
| SPRYD3                         | USH1C                           | DGUOK                          | BMT2                            |                                | MLLT11                          |
| NECAP1                         | ID3                             | MRPL4                          | MAGT1                           |                                | UBE2G1                          |
| KLC2                           | PIK3R3                          | GEN1                           | GSK3B                           |                                | MSMO1                           |
| ZNF141                         | FADS2                           | MAPK12                         | SGCE                            |                                | SCP2                            |
| TIMP1                          | PATJ                            | NDUFS5                         | MMAB                            |                                | PTTG1IP                         |
| PSRC1                          | CYS1                            | NTNG1                          | TNS2                            |                                | EFNA5                           |
| MRT04                          | ADD3                            | ATP5L                          | LEPR                            |                                | RAP2A                           |
| MIER2                          | LRRC61                          | NT5DC2                         | DDX60                           |                                | TUSC3                           |
| MGC27345                       | CAT                             | ZNF202                         | DSE                             |                                | ARPC1B                          |
| PCOLCE2                        | SGK2                            | HAUS6                          | HOXA10-HOXA9                    |                                | RNF10                           |
| UBE2T                          | MCU                             | DPM2                           | B4GALT1                         |                                | TNFRSF1A                        |
| KRI1                           | IPP                             | CKAP5                          | HSPB8                           |                                | SNAP23                          |
| HSD17B10                       | MAL                             | HOXD9                          | SERPINB1                        |                                | CCDC71L                         |
| REXO1                          | CDH16                           | GPI                            | SLITRK5                         |                                | DSCR3                           |
| NANS                           | GUCY1B3                         | SPATC1L                        | MAP3K7                          |                                | SPECC1                          |
| CCNB1IP1                       | CTTNBP2NL                       | TAF1C                          | PTPRD                           |                                | NDRG3                           |
| WDR75                          | IGF2BP3                         | DONSON                         | TMED5                           |                                | IFNAR1                          |
| ANKRD52                        | ARMT1                           | TICRR                          | C9orf3                          |                                | TGOLN2                          |



**Table S1. USP13 and ZHX2 commonly regulated gene in 786-O cells(Supplement).**

| <b>Common upregulated DEGs</b> | <b>Common downregulate DEGs</b> | <b>Common upregulated DEGs</b> | <b>Common downregulate DEGs</b> | <b>Common upregulated DEGs</b> | <b>Common downregulate DEGs</b> |
|--------------------------------|---------------------------------|--------------------------------|---------------------------------|--------------------------------|---------------------------------|
| GRB14                          | FAM84B                          | DNMT3B                         | SHISA4                          |                                | TSC22D3                         |
| RELL2                          | PHACTR4                         | JMJD7-PLA2G4B                  | TRAM1                           |                                | MKRN1                           |
| RAD54L                         | TCF12                           | NDUFA6                         | ACBD5                           |                                | CALM3                           |
| C11orf1                        | MPC2                            | ATF4                           | CDK15                           |                                | AKR1B1                          |
| IGFN1                          | VCAN                            | RPS10                          | USP6NL                          |                                | MAN1B1                          |
| SLC25A32                       | MID1                            | NR2C2AP                        | EPDR1                           |                                | TMSB4X                          |
| SNHG1                          | SLC4A4                          | DDA1                           | SC5D                            |                                | ARL8B                           |
| TMEM164                        | CA2                             | SRPK1                          | CREB5                           |                                | MAP4K4                          |
| DUS1L                          | SEMA5B                          | IMPDH2                         | PHF6                            |                                | ATP5B                           |
| GADD45GIP1                     | PLXND1                          | BRD9                           | CDKN2C                          |                                | CAPN1                           |
| DSN1                           | SLC6A6                          | ATG4D                          | CTSV                            |                                | SMARCA2                         |
| BCS1L                          | PTPRG                           | GIGYF1                         | CYB561D1                        |                                | LUZP6                           |
| RTEL1                          | TRIM22                          | LRRC8E                         | CNN3                            |                                | BLOC1S6                         |
| SDCCAG3                        | TRABD2B                         | ELMO2                          | USP25                           |                                | ME1                             |
| SLC25A25-AS1                   | CAMK2N1                         | CLASRP                         | TNFAIP2                         |                                | SRP72                           |
| TRMT61A                        | TTC30A                          | RPS15                          | MDFIC                           |                                | KLF6                            |
| RPS26                          | MAN1A1                          | ATP5H                          | TPD52L1                         |                                | PCBP2                           |
| DYNLRB1                        | AMOT                            | SLC25A12                       | C9orf172                        |                                | ELOVL5                          |
| FAU                            | CDKL5                           | TONSL                          | FADS1                           |                                |                                 |
| ARFRP1                         | IDH1                            | TRMT2A                         | AHCYL1                          |                                |                                 |

**Table S2. The list and data of 69\_common\_genes the 390 coordinately downregulated ZHX2 and p65 genes and the 943 downregulated USP13 KD Genes.**

|          | Base-Mean   | log2FoldChange | lfcSE      | stat      | pvalue    | padj     |
|----------|-------------|----------------|------------|-----------|-----------|----------|
| VCAM1    | 141.5808116 | -1.435598644   | 0.11375138 | -12.62049 | 1.63E-36  | 3.62E-33 |
| SLC6A12  | 159.6749017 | -0.659801224   | 0.11739298 | -5.620449 | 1.90E-08  | 1.35E-06 |
| NXNL2    | 98.34322114 | -0.575711235   | 0.1331792  | -4.322831 | 1.54E-05  | 0.000429 |
| MSC      | 193.0181291 | -0.571091436   | 0.12218968 | -4.673811 | 2.96E-06  | 0.000106 |
| HMGCS1   | 2542.404618 | -0.549342921   | 0.07950173 | -6.909824 | 4.85E-12  | 8.31E-10 |
| CSF1     | 962.6492177 | -0.536793324   | 0.07292707 | -7.360687 | 1.83E-13  | 4.21E-11 |
| IFI44L   | 462.0744148 | -0.53454194    | 0.11193628 | -4.775413 | 1.79E-06  | 6.94E-05 |
| MSMO1    | 1941.183338 | -0.522607756   | 0.06667581 | -7.838041 | 4.58E-15  | 1.45E-12 |
| CA2      | 4308.128046 | -0.506881031   | 0.04666167 | -10.8629  | 1.73E-27  | 2.27E-24 |
| BAMBI    | 126.1246557 | -0.506328803   | 0.13478008 | -3.756703 | 0.0001722 | 0.00309  |
| MMAA     | 185.828576  | -0.497909892   | 0.10726399 | -4.641911 | 3.45E-06  | 0.000121 |
| MAF      | 939.0205698 | -0.471997758   | 0.074032   | -6.375591 | 1.82E-10  | 2.17E-08 |
| ABCC2    | 674.140003  | -0.467573575   | 0.09165329 | -5.101547 | 3.37E-07  | 1.61E-05 |
| PLEK     | 70.04356102 | -0.461855419   | 0.13979207 | -3.303874 | 0.0009536 | 0.011989 |
| GBP2     | 194.5512502 | -0.45809744    | 0.10041262 | -4.56215  | 5.06E-06  | 0.00017  |
| BIRC3    | 795.9863616 | -0.453122061   | 0.14281735 | -3.172738 | 0.0015101 | 0.017058 |
| TMEM65   | 902.6081526 | -0.452503894   | 0.06344556 | -7.13216  | 9.88E-13  | 1.88E-10 |
| DMRTA1   | 164.0443315 | -0.447080977   | 0.11696706 | -3.822281 | 0.0001322 | 0.002497 |
| PLXND1   | 1423.813096 | -0.445253986   | 0.06029873 | -7.384136 | 1.53E-13  | 3.66E-11 |
| FGFR3    | 1257.800948 | -0.44010992    | 0.08044478 | -5.470957 | 4.48E-08  | 2.89E-06 |
| SQLE     | 3066.225956 | -0.436214629   | 0.05716122 | -7.631304 | 2.32E-14  | 6.75E-12 |
| GMNC     | 110.1473753 | -0.432923953   | 0.14447078 | -2.99662  | 0.0027299 | 0.026204 |
| PORCN    | 310.9369308 | -0.418948967   | 0.11673292 | -3.588953 | 0.000332  | 0.005271 |
| TNFAIP6  | 95.55415304 | -0.411760991   | 0.12415887 | -3.316404 | 0.0009118 | 0.011573 |
| TLR3     | 176.9916631 | -0.392737512   | 0.12786731 | -3.071446 | 0.0021302 | 0.021829 |
| S1PR1    | 96.60027144 | -0.392594951   | 0.12921241 | -3.038369 | 0.0023786 | 0.023754 |
| VAV3     | 1776.007644 | -0.388710329   | 0.10280828 | -3.780924 | 0.0001562 | 0.002854 |
| TMEM141  | 2924.028462 | -0.386323606   | 0.07780074 | -4.965552 | 6.85E-07  | 3.00E-05 |
| LSS      | 2642.084285 | -0.375549585   | 0.06264899 | -5.994503 | 2.04E-09  | 1.85E-07 |
| DDX60    | 1026.026415 | -0.374350517   | 0.1347831  | -2.777429 | 0.0054791 | 0.04397  |
| KIAA1217 | 1321.195369 | -0.356344456   | 0.07201419 | -4.948253 | 7.49E-07  | 3.25E-05 |
| STARD4   | 1137.248496 | -0.355322586   | 0.08073456 | -4.401121 | 1.08E-05  | 0.000316 |
| SLC44A2  | 1371.045995 | -0.349527589   | 0.071199   | -4.909165 | 9.15E-07  | 3.88E-05 |
| RASSF4   | 678.453212  | -0.348908287   | 0.07871996 | -4.432272 | 9.32E-06  | 0.000279 |
| SFRP4    | 133.3544672 | -0.346388486   | 0.11876356 | -2.916623 | 0.0035384 | 0.031729 |
| CDKL5    | 645.8671249 | -0.341133955   | 0.08799164 | -3.876891 | 0.0001058 | 0.002074 |
| OAS1     | 325.0215125 | -0.338021197   | 0.11486319 | -2.942816 | 0.0032524 | 0.029703 |
| SCD      | 16318.27623 | -0.335308671   | 0.07441905 | -4.505683 | 6.62E-06  | 0.000211 |
| SEMA5B   | 538.4854395 | -0.330134333   | 0.11398846 | -2.896208 | 0.003777  | 0.033372 |
| MTMR11   | 119.2072175 | -0.326721587   | 0.11473866 | -2.847528 | 0.004406  | 0.037116 |
| SAMD9L   | 582.8166025 | -0.325517703   | 0.10605495 | -3.069331 | 0.0021454 | 0.021967 |
| PTPRD    | 1485.503675 | -0.323516694   | 0.07699358 | -4.201866 | 2.65E-05  | 0.000674 |
| ADD3     | 1657.566825 | -0.319924018   | 0.08526654 | -3.752046 | 0.0001754 | 0.003143 |
| MAP7D2   | 520.1899954 | -0.31579407    | 0.08098805 | -3.899268 | 9.65E-05  | 0.001923 |
| SGK2     | 1120.771005 | -0.315374364   | 0.06737029 | -4.681209 | 2.85E-06  | 0.000103 |
| MAN1A1   | 803.2465269 | -0.309122132   | 0.08815025 | -3.506764 | 0.0004536 | 0.00667  |
| TMEM2    | 1703.145747 | -0.302692329   | 0.05893593 | -5.135956 | 2.81E-07  | 1.36E-05 |
| CD24     | 11234.19395 | -0.302142559   | 0.05698882 | -5.301787 | 1.15E-07  | 6.41E-06 |
| TRABD2B  | 443.0562852 | -0.301152445   | 0.08497113 | -3.544174 | 0.0003938 | 0.006044 |
| TRIM5    | 987.6361021 | -0.293133348   | 0.07671004 | -3.821316 | 0.0001327 | 0.002502 |
| TSC22D3  | 444.2108474 | -0.290141327   | 0.09573539 | -3.030659 | 0.0024402 | 0.024168 |
| NEFL     | 3666.992765 | -0.28473211    | 0.05430405 | -5.243294 | 1.58E-07  | 8.39E-06 |
| AKR1B1   | 14326.46676 | -0.281408437   | 0.06843071 | -4.112312 | 3.92E-05  | 0.000934 |
| SHISA4   | 340.6602262 | -0.280999517   | 0.0991879  | -2.833002 | 0.0046113 | 0.038314 |
| DSE      | 405.1065809 | -0.279225922   | 0.09735976 | -2.867981 | 0.004131  | 0.035517 |
| CACHD1   | 590.2392219 | -0.275190525   | 0.08835347 | -3.114655 | 0.0018416 | 0.01975  |
| HGD      | 951.7478393 | -0.248557811   | 0.06052933 | -4.106403 | 4.02E-05  | 0.000948 |
| TM4SF18  | 2154.665972 | -0.24730118    | 0.08278972 | -2.9871   | 0.0028164 | 0.026785 |
| SLC25A1  | 1792.884646 | -0.246666697   | 0.06694975 | -3.684356 | 0.0002293 | 0.0039   |
| TRIM22   | 886.1560607 | -0.242551044   | 0.08771578 | -2.765193 | 0.0056889 | 0.045079 |
| SLC4A4   | 2168.614851 | -0.237525309   | 0.06588348 | -3.605233 | 0.0003119 | 0.005017 |
| ARSD     | 1165.289545 | -0.231247578   | 0.07811855 | -2.960214 | 0.0030743 | 0.028387 |
| SLC6A6   | 8104.397606 | -0.219697182   | 0.07997632 | -2.747028 | 0.0060138 | 0.046684 |
| MVP      | 9671.299488 | -0.219573051   | 0.05670513 | -3.87219  | 0.0001079 | 0.002102 |
| H6PD     | 1790.096805 | -0.214323552   | 0.06219875 | -3.445785 | 0.0005694 | 0.008079 |
| TTYH3    | 9793.013445 | -0.207236816   | 0.06677896 | -3.103325 | 0.0019136 | 0.02023  |
| OPTN     | 2104.034445 | -0.185457403   | 0.06404301 | -2.895826 | 0.0037816 | 0.033372 |
| ZHX2     | 1950.075916 | -0.175832293   | 0.04935152 | -3.562855 | 0.0003668 | 0.005682 |
| MID1     | 2047.590877 | -0.174407397   | 0.05559515 | -3.137097 | 0.0017063 | 0.018629 |

**Reference:**

1.Zhang J, *et al.* (2018) VHL substrate transcription factor ZHX2 as an oncogenic driver in clear cell renal cell carcinoma. *Science* 361(6399):290-295.
